# Supplementary material
Source: PubMed Central journal article supplement (PMC3366593)

# Appendix Figure 1

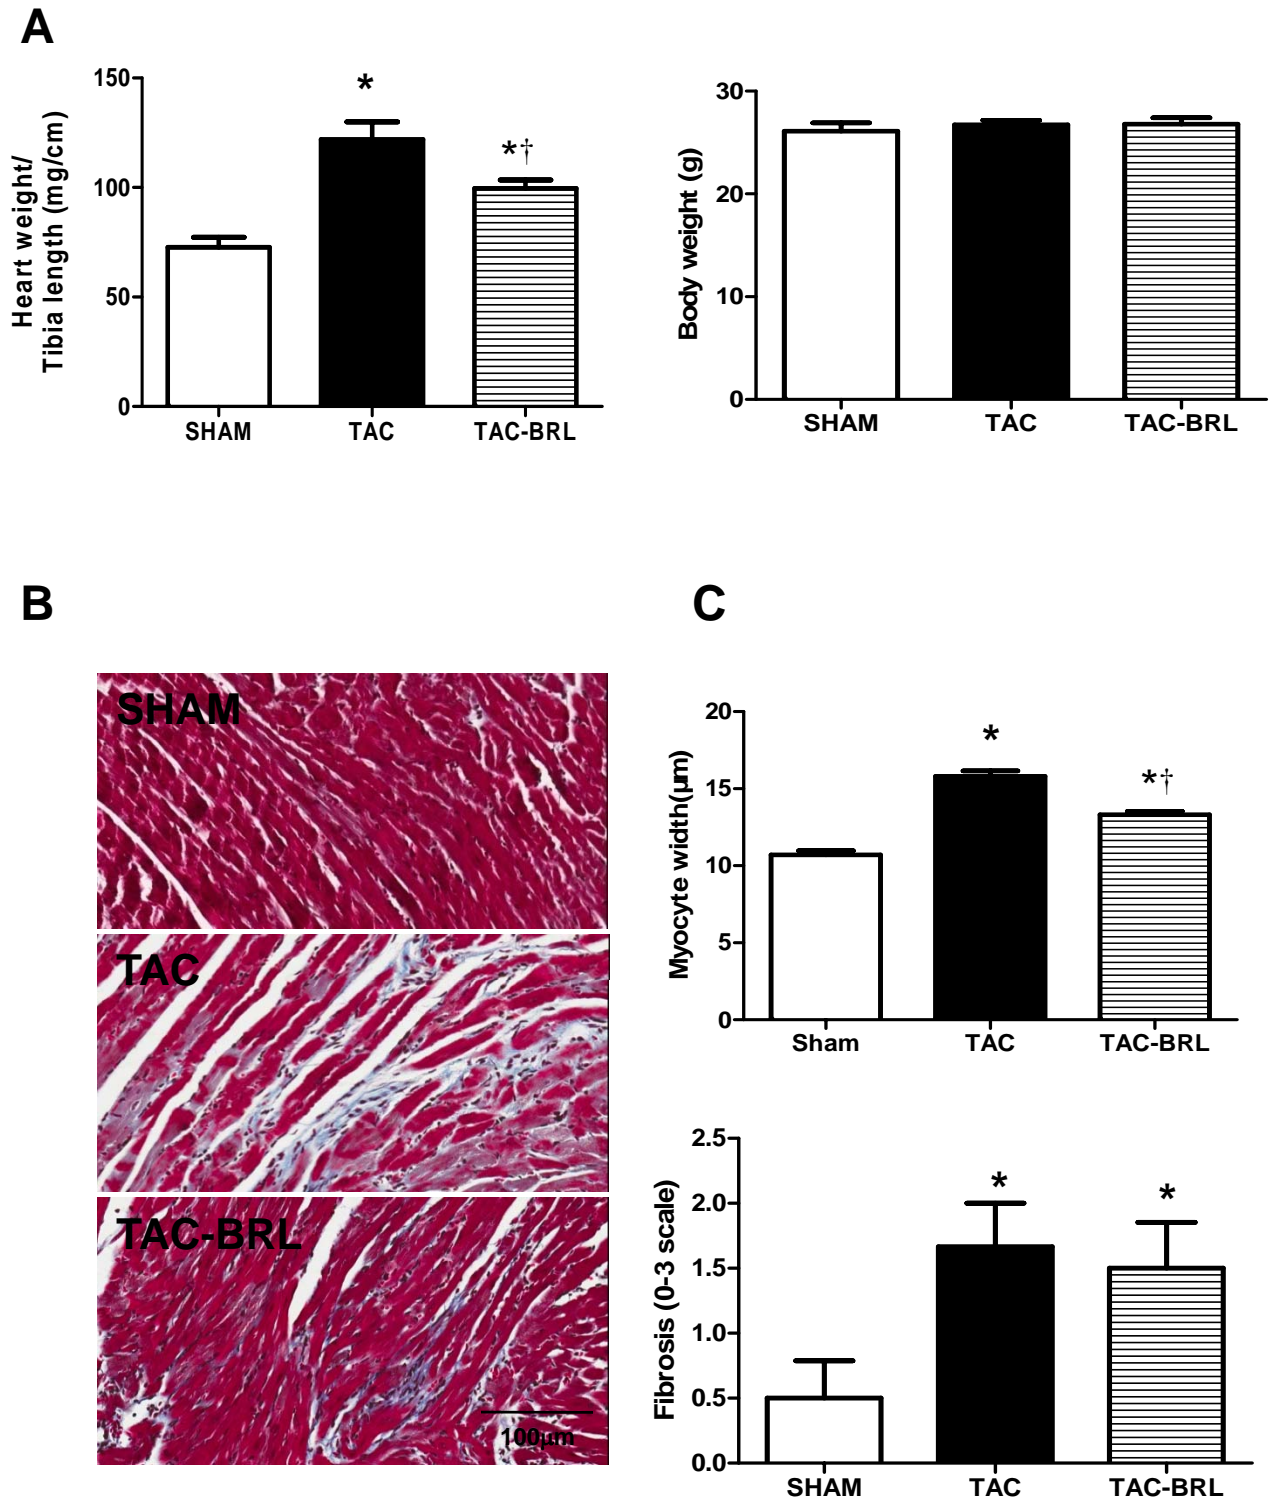

# Appendix Figure 2

**A**

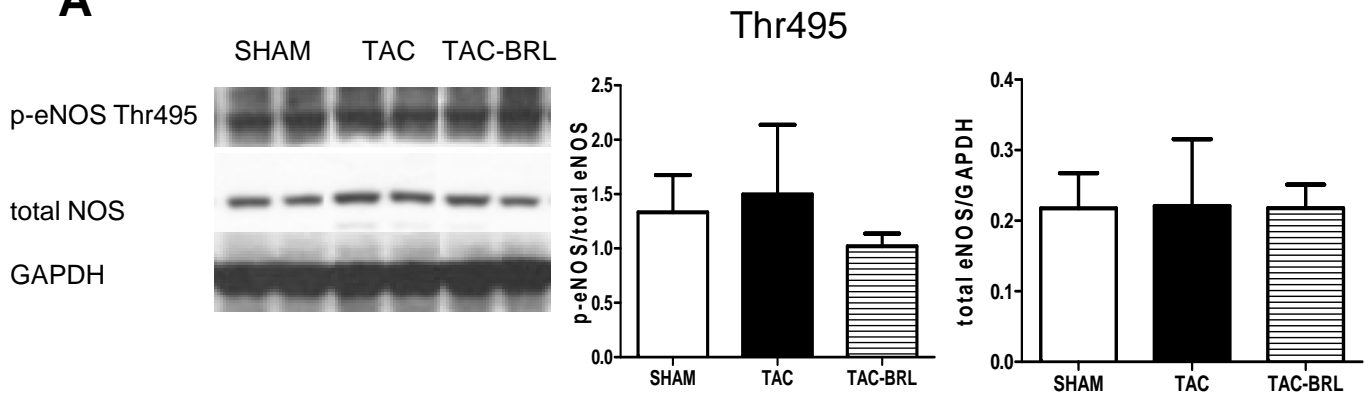

**B**

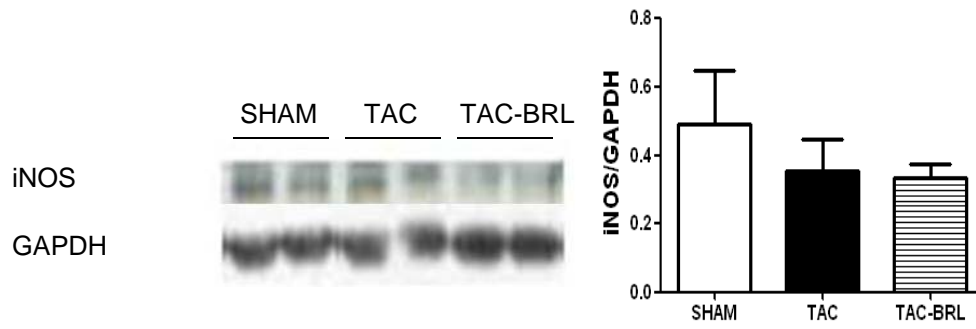

Supplement: NIHMS376608-supplement-01.pdf [file NIHMS376608-supplement-01.pdf]
